# Supplementary material for: MXene-based multifunctional smart fibers for wearable and portable electronics
Source: Royal Society of Chemistry journal article supplement (doi:10.1039/d2ta01428a), 2022-01-01
Supplement: d2ta01428a1.pdf [file d2ta01428a1.pdf]

## Supporting Information

### **MXene-based multifunctional smart fibers for wearable and portable-electronics**

Leiqiang Qin,<sup>\*a</sup> Jianxia Jiang,<sup>a,b</sup> Lintao Hou,<sup>c</sup> Fengling Zhang<sup>a</sup> and Johanna Rosen<sup>\*a</sup>

<sup>a</sup> Department of Physics, Chemistry and Biology (IFM), Linköping University, Linköping, SE-58183, Sweden. E-mail: [leiqiang.qin@liu.se](mailto:leiqiang.qin@liu.se); [Johanna.rosen@liu.se](mailto:Johanna.rosen@liu.se)

<sup>b</sup> Flexible Electronics Innovation Institute, Jiangxi Science and Technology Normal University, Nanchang, 330013, China.

<sup>c</sup> Guangzhou Key Laboratory of Vacuum Coating Technologies and New Energy Materials, Physics Department, Jinan University, Guangzhou, 510632, China.

The gravimetric capacitance from the cyclic voltammetry data is determined from the following equation (1):

$$C = \frac{1}{\Delta V} \int \frac{j dV}{s} \quad (1)$$

$C$  is the normalized capacitance (in units of  $F g^{-1}$ ),  $j$  is the current density (in  $A g^{-1}$ ),  $s$  is the rate (in  $V s^{-1}$ ),  $V$  is the voltage (in  $V$ ),  $\Delta V$  is the voltage window (in  $V$ ).

In order to achieve optimal performance with asymmetric supercapacitors, there should be a charge balance between the positive and negative electrodes. The mass ratio of positive and negative electrodes is determined by using the charge balance theory as follows:

$$q = C \times V \times m \quad (2)$$

where  $C$ ,  $V$  and  $m$  are specific capacitance, potential range and mass of the active material, respectively. To attain the charge balance, the following condition must be satisfied

$$q_+ = q_- \quad (3)$$

$$\frac{m_+}{m_-} = \frac{C_+ \times V_+}{C_- \times V_-} \quad (4)$$

The energy density of the device is obtained from the formula given in Equation (5):

$$E = \frac{1}{2} \times C_{device}^{gravimetric} \times \frac{(\Delta V)^2}{3600} \quad (5)$$

where  $E$  is the energy density (in  $Wh/g$ ),  $C_{device}^{gravimetric}$  is the gravimetric capacitance obtained from Equation (1) and  $\Delta V$  is the discharge voltage range (in volts,  $V$ ).

The power density of the device is calculated from the formula given in Equation (6):

$$P = \frac{E}{\Delta t} \times 3600 \quad (6)$$

where  $P$  is the power density (in  $W/g$ ),  $E$  is the gravimetric energy density obtained from Equation (5) and  $\Delta t$  is the discharge time (in seconds,  $s$ ).

The ion-diffusion mechanism in the fibers was investigated by analyzing the function curves of peak current ( $i_p$ ) against scan rate ( $v$ ) from the cyclic voltammograms, following the power law dependence of  $i_p$  on  $v$ ,  $i_p = av^b$ , where  $a$  and  $b$  are adjustable parameters. The value of  $b$  provides

important insights into the charge-storage kinetics: when  $b$  is close to 1, it indicates a high-rate capacitive storage mechanism, and  $b \approx 0.5$  is the signature of slow semi-infinite diffusion.

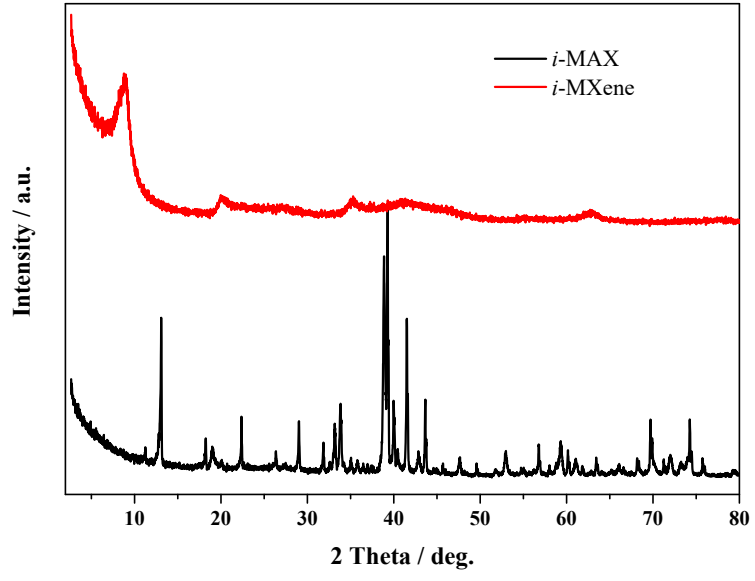

Fig. S1. XRD pattern of *i*-MAX phase and *i*-MXene.

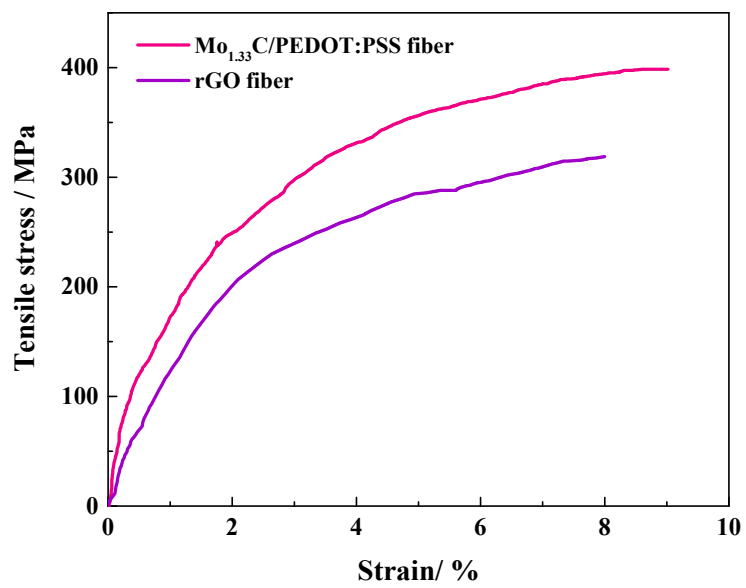

Fig. S2. Typical stress-strain curves of Mo<sub>1.33</sub>C/PEDOT:PSS fiber and rGO fiber.

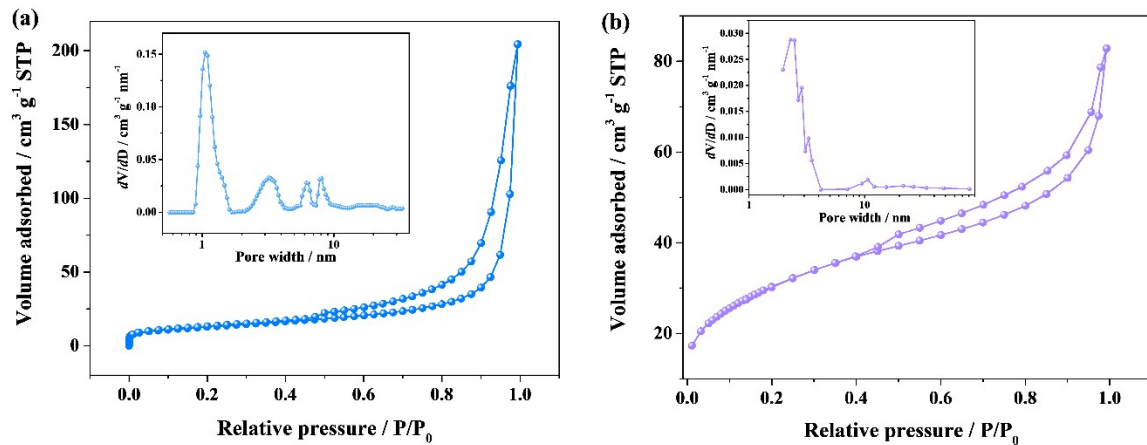

Figure S3. N<sub>2</sub> adsorption-desorption isotherms (STP, standard temperature and pressure) of Mo<sub>1.33</sub>C/PEDOT:PSS fiber (a) and rGO fiber (b). The inset is their corresponding pore-size distribution.

N<sub>2</sub> adsorption-desorption measurements confirm the porosity of the Mo<sub>1.33</sub>C/PEDOT:PSS fiber and rGO fiber. The Mo<sub>1.33</sub>C/PEDOT:PSS fiber exhibited a micropore-dominated pore-size distribution (Fig. S3 a), while rGO fiber showed a pore size distribution dominated by mesopores.

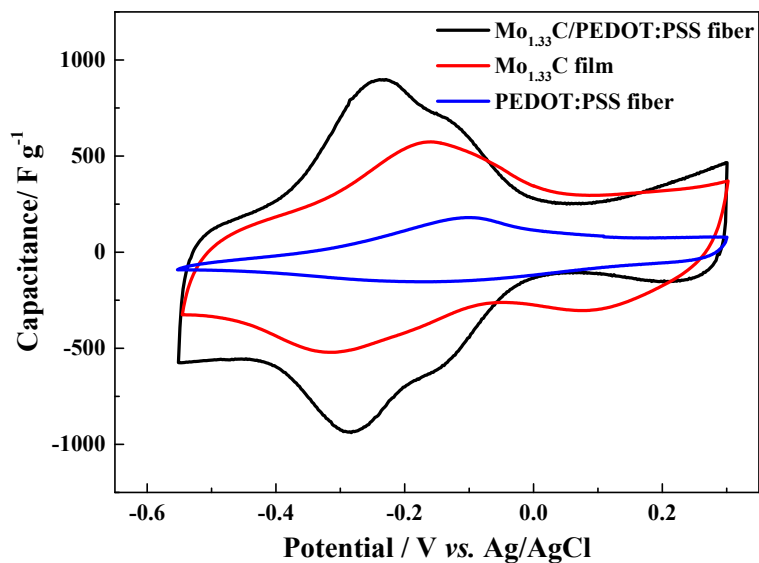

Fig. S4. The cyclic voltammograms of pristine Mo<sub>1.33</sub>C film, PEDOT:PSS fiber and Mo<sub>1.33</sub>C /PEDOT:PSS hybrid fiber at scan rate 50 mV s<sup>-1</sup> for compare the electrochemical performance. The fibers of Mo<sub>1.33</sub>C could not be prepared using the method in this work. The electrochemical performance of pristine Mo<sub>1.33</sub>C film was used to instead the Mo<sub>1.33</sub>C fibers.

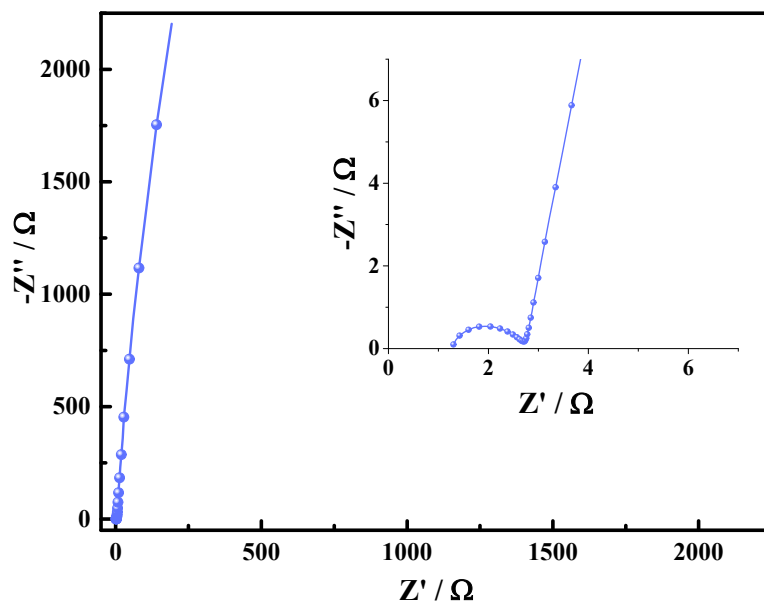

Fig. S5. The Nyquist plot of a hybrid fiber electrode in 3 M H<sub>2</sub>SO<sub>4</sub>.



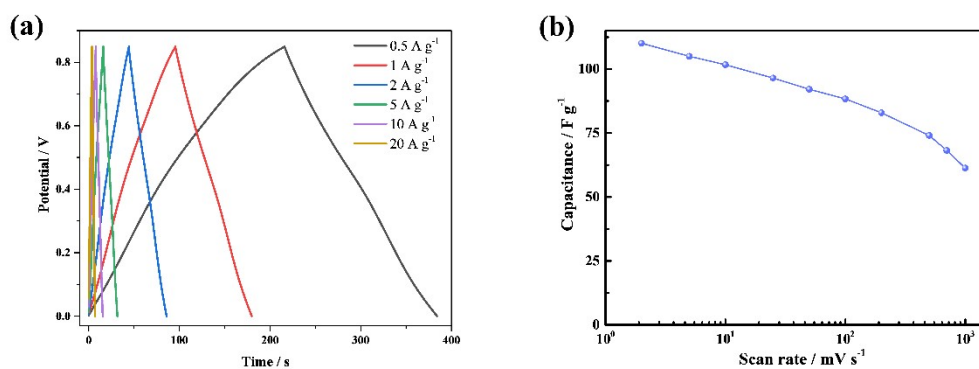

Fig. S6. a) Galvanostatic charge-discharge (GCD) curves of a symmetrical fiber type supercapacitor at different current densities. b) Capacitance of a symmetrical fiber type supercapacitor as a function of scan rate.

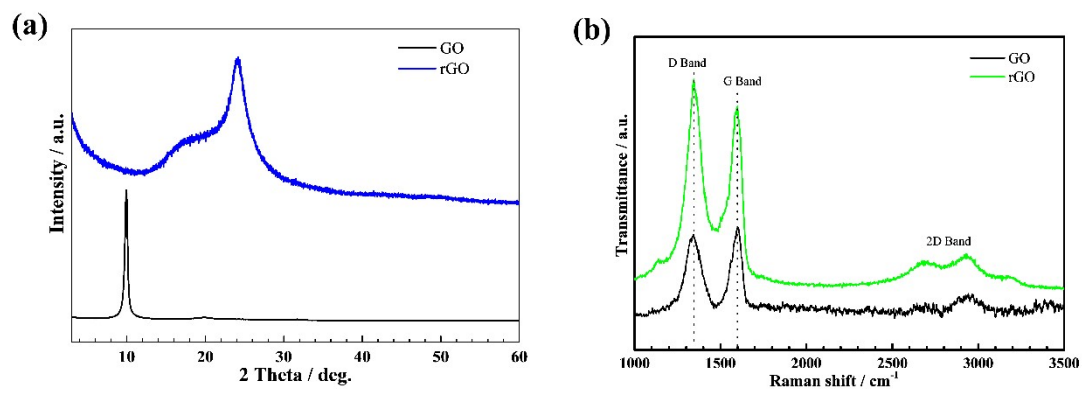

Fig. S7. XRD (a) and Raman (b) spectra of GO and rGO fiber.

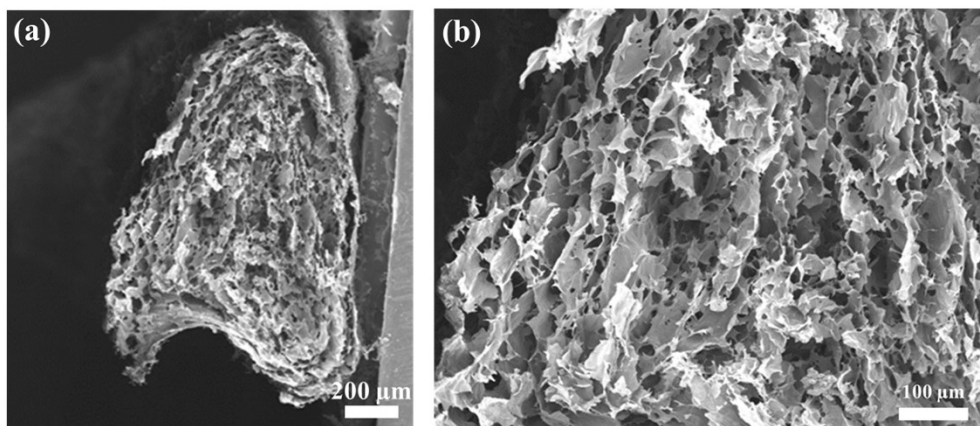

Fig. S8. SEM image of a cross-section of a hybrid fiber at different magnifications.

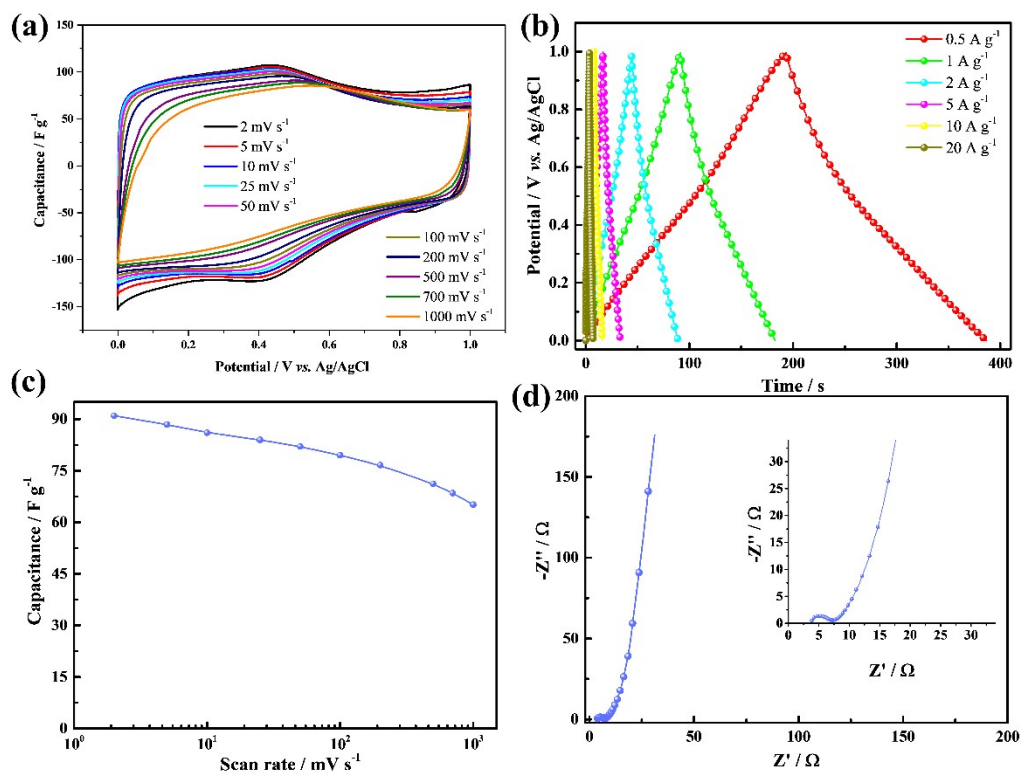

Fig. S9. Electrochemical performance of rGO fiber electrodes. a) CV curves of rGO fiber electrodes at different scan rates. b) Galvanostatic charge-discharge (GCD) curves of fiber electrodes at different current densities. c) Capacitance of fiber electrodes as a function of scan rate. d) EIS curve of rGO fiber electrode.

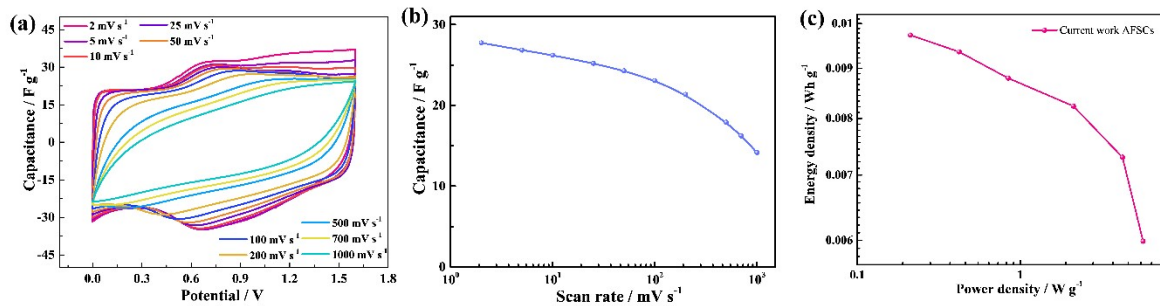

Fig. S10. Electrochemical performance of asymmetric fiber type supercapacitors (AFSCs) considering electrolytes developed using MXene-based fibers as cathodes and rGO fibers as anode. a) CV curves of Mo<sub>1.33</sub>C/PEDOT:PSS//rGO fiber-based supercapacitors at different scan rate. b) Scan rate dependent capacitance of AFSCs. c) Plot of energy density versus power density for AFSCs.

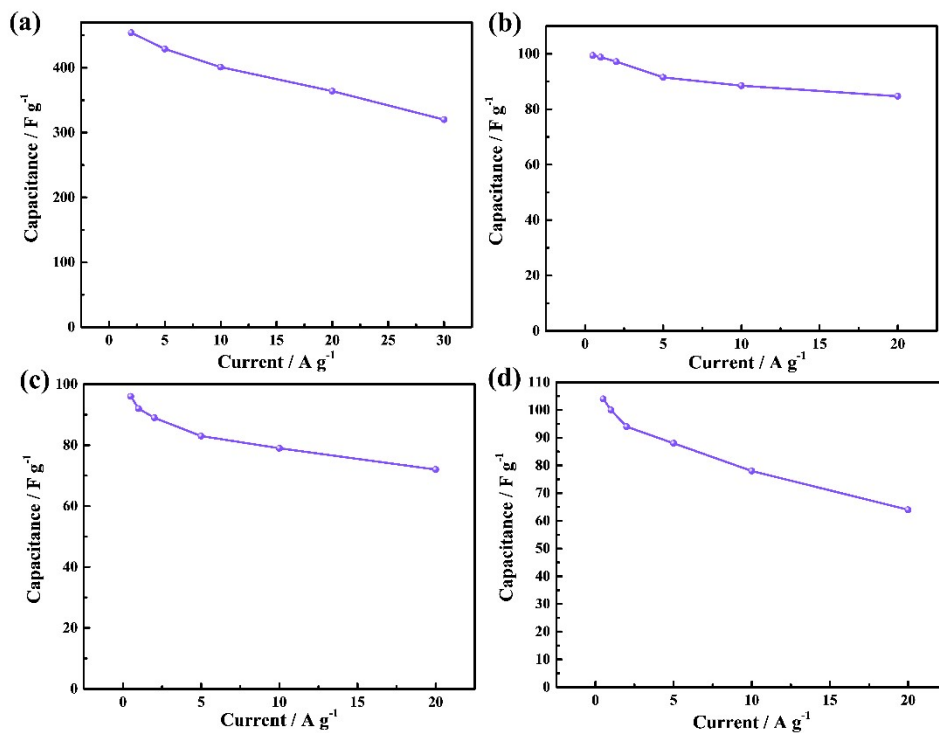

Fig. S11. The specific capacitance curves of Mo<sub>1.33</sub>C /PEDOT:PSS hybrid fiber in 3 M H<sub>2</sub>SO<sub>4</sub> (a), Mo<sub>1.33</sub>C /PEDOT:PSS hybrid fiber based symmetrical supercapacitors (b), rGO fiber based symmetrical supercapacitors (c) and Mo<sub>1.33</sub>C /PEDOT:PSS//rGO fiber-based Supercapacitors (d) calculated from GCD.

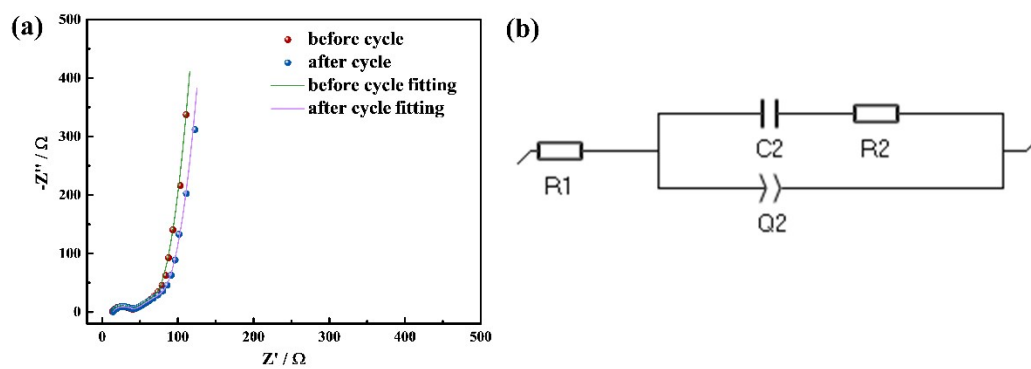

Fig. S12. (a) EIS and corresponding fitted curves of asymmetric fiber type supercapacitors before and after the cycling test. (b) The equivalent circuit using for fitting.

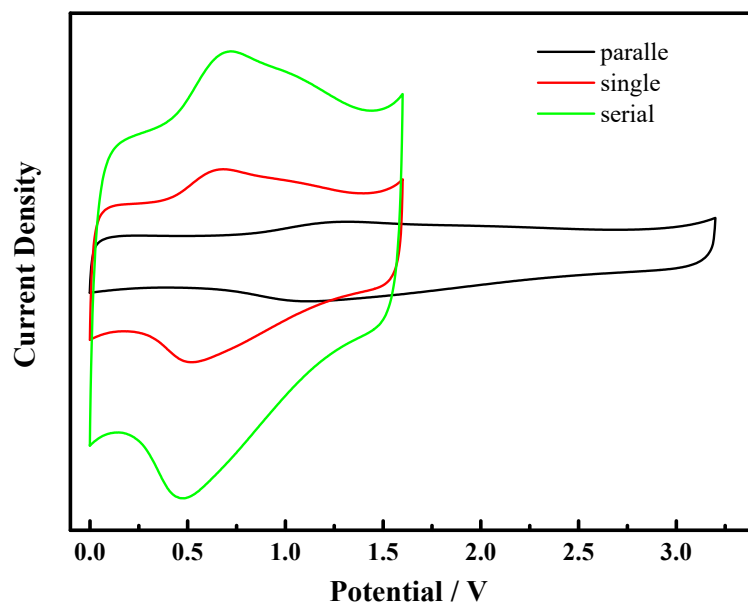

Fig. S13. CV curves of up to two AFSCs connected in parallel and in series.



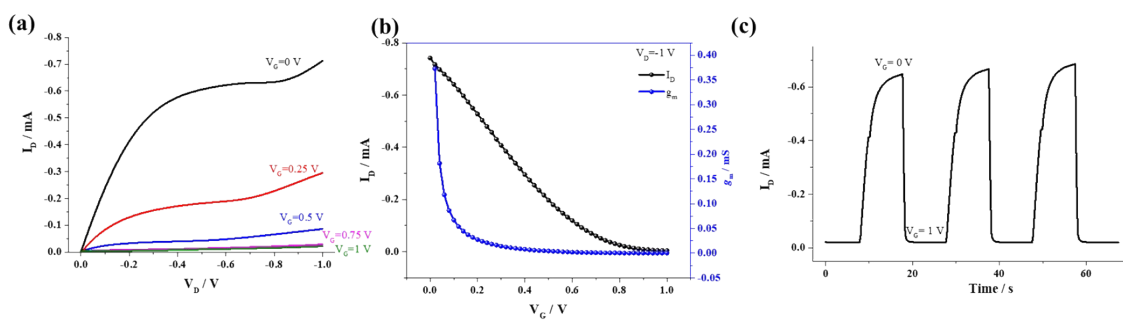

Fig. S14. Planar OEET based on PEDOT:PSS. PEDOT:PSS solution were spin coated on interdigitated microelectrode (IDME). 1 M  $\text{H}_2\text{SO}_4$  as electrolyte and Ag/AgCl as gate (G). a) Output characteristics of a PEDOT:PSS-based OEET showing the drain-source current  $I_D$  with respect to the drain-source voltage  $V_D$ . The gate voltage  $V_G$  was varied from 0 to 1.0 V. b) Transfer characteristics of the same device and the corresponding transconductance ( $g_m$ ) values at  $V_D = -1$  V. c) Corresponding transient characteristics showing  $I_D$  as a function of time  $t$  during repeated switching of  $V_G$  between 0 and 1.0 V.

Table S1. Comparison of reported electrochemical performance of fibers based on 2D nanomaterials.

| electrode                                             | Fabrication method | electrolyte                  | $C_v / F \text{ cm}^{-3}$ | $C_g / F \text{ g}^{-1}$ | Ref.      |
|-------------------------------------------------------|--------------------|------------------------------|---------------------------|--------------------------|-----------|
| $\text{Ti}_3\text{C}_2\text{T}_z/\text{rGO}$          | Wet spinning       | 1 M $\text{H}_2\text{SO}_4$  | 341                       | 257                      | 1         |
| $\text{Ti}_3\text{C}_2\text{T}_z/\text{PEDOT:PSS}$    | Wet spinning       | 1 M $\text{H}_2\text{SO}_4$  | 615                       | 258                      | 2         |
| RGO/PEDOT:PSS                                         | Wet spinning       | PVA/ $\text{H}_3\text{PO}_4$ | 143                       | 63.1                     | 3         |
| Neat $\text{Ti}_3\text{C}_2\text{T}_z$                | Wet spinning       | 1 M $\text{H}_2\text{SO}_4$  | 1265                      | 393                      | 4         |
| $\text{Ti}_3\text{C}_2\text{T}_z/\text{carbon fiber}$ | Electrospinning    | 1 M $\text{H}_2\text{SO}_4$  | N/A                       | 110                      | 5         |
| $\text{Ti}_3\text{C}_2\text{T}_z/\text{CNT}$          | Electrospinning    | 1 M $\text{H}_2\text{SO}_4$  | N/A                       | 100                      | 6         |
| Graphene/ $\text{MoS}_2$                              | hydrothermal       | PVA/ $\text{H}_3\text{PO}_4$ | 368                       | 248                      | 7         |
| CNT/Graphene/PANI                                     | Wet spinning       | PVA/ $\text{H}_3\text{PO}_4$ | 273.7                     | 226                      | 8         |
| $\text{Mo}_{1.33}\text{C}/\text{PEDOT:PSS}$           | spinning           | 3 M $\text{H}_2\text{SO}_4$  | N/A                       | 457                      | This work |

Table S2. The fitting result of the element.

| Element                    | Before cycle | After cycle |
|----------------------------|--------------|-------------|
| R1/ $\Omega$               | 13.3         | 14.4        |
| R2/ $\Omega$               | 26.1         | 26.3        |
| C2/F                       | 6.6E-06      | 9.0E-06     |
| Q2/ $\text{Fs}^{(a^{-1})}$ | 0.0168       | 0.0158      |
| a2                         | 0.41         | 0.38        |

Reference:

- [1] S. Seyedin, E. R. S. Yanza, J. M. Razal, *J. Mater. Chem. A* **2017**, *5*, 24076.
- [2] J. Zhang, S. Seyedin, S. Qin, Z. Wang, S. Moradi, F. Yang, P. A. Lynch, W. Yang, J. Liu, X. Wang, J. M. Razal, *Small* **2019**, *15*, 1804732.
- [3] G. Qu, J. Cheng, X. Li, D. Yuan, P. Chen, X. Chen, B. Wang, H. Peng, *Adv. Mater.* **2016**, *28*, 3646.
- [4] J. Zhang, S. Uzun, S. Seyedin, P. A. Lynch, B. Akuzum, Z. Wang, S. Qin, M. Alhabeab, C. E. Shuck, W. Lei, E. C. Kumbur, W. Yang, X. Wang, G. Dion, J. M. Razal, Y. Gogotsi, *ACS Cent. Sci.* **2020**, *6*, 254.

- [5] A. S. Levitt, M. Alhabeab, C. B. Hatter, A. Sarycheva, G. Dion, Y. Gogotsi, *J. Mater. Chem. A* **2019**, *7*, 269.
- [6] Z. Zhou, W. Panatdasirisuk, T. S. Mathis, B. Anasori, C. Lu, X. Zhang, Z. Liao, Y. Gogotsi, S. Yang, *Nanoscale* **2018**, *10*, 6005.
- [7] B. Wang, Q. Wu, H. Sun, J. Zhang, J. Ren, Y. Luo, M. Wang, H. Peng, *J. Mater. Chem. A* **2017**, *5*, 925.
- [8] Z. Lu, J. Foroughi, C. Wang, H. Long, G. G. Wallace, *Adv. Energy Mater.* **2018**, *8*, 1702047.
